# Supplementary material
Source: PubMed Central journal article supplement (PMC2529253)

**Spectroscopic and Functional Characterization of  
Nitrophorin 7 from the Blood-Feeding Insect  
*Rhodnius prolixus* Reveals an Important Role of Its  
Isoform-Specific N-Terminus for Proper Protein  
Function<sup>†</sup>**

Markus Knipp,<sup>\*</sup> Fei Yang, Robert E. Berry, Hongjun Zhang, Maxim N. Shokhirev, and F. Ann Walker

*Department of Chemistry, The University of Arizona, 1306 East University Boulevard, Tucson, AZ  
85721-0041, USA*

---

<sup>†</sup> This work was financially supported by the Swiss National Science Foundation (SNF), grant PA00A--109035/1 (to M.K.), and by the National Institutes of Health (NIH), grant HL54826 (to F.A.W.).

<sup>\*</sup> Corresponding author: Tel: +1-520-621-9697; Fax: +1-520-621-8407; E-mail: mknipp@email.arizona.edu.

FIGURE S1. Relative chemical shift of the heme methyls vs. ligand plane angle or effective ligand plane angle if two planar ligands are present, as calculated for low-spin ferrihemes. (Shokhirev, N. V.; Walker, F. A. (1998) *J. Biol. Inorg. Chem.* 3, 581–594 ; “Shift Patterns,” Shokhirev, N. V.; Walker, F. A. <http://www.shokhirev.com/nikolai/programs/prgsciedu.html>.)

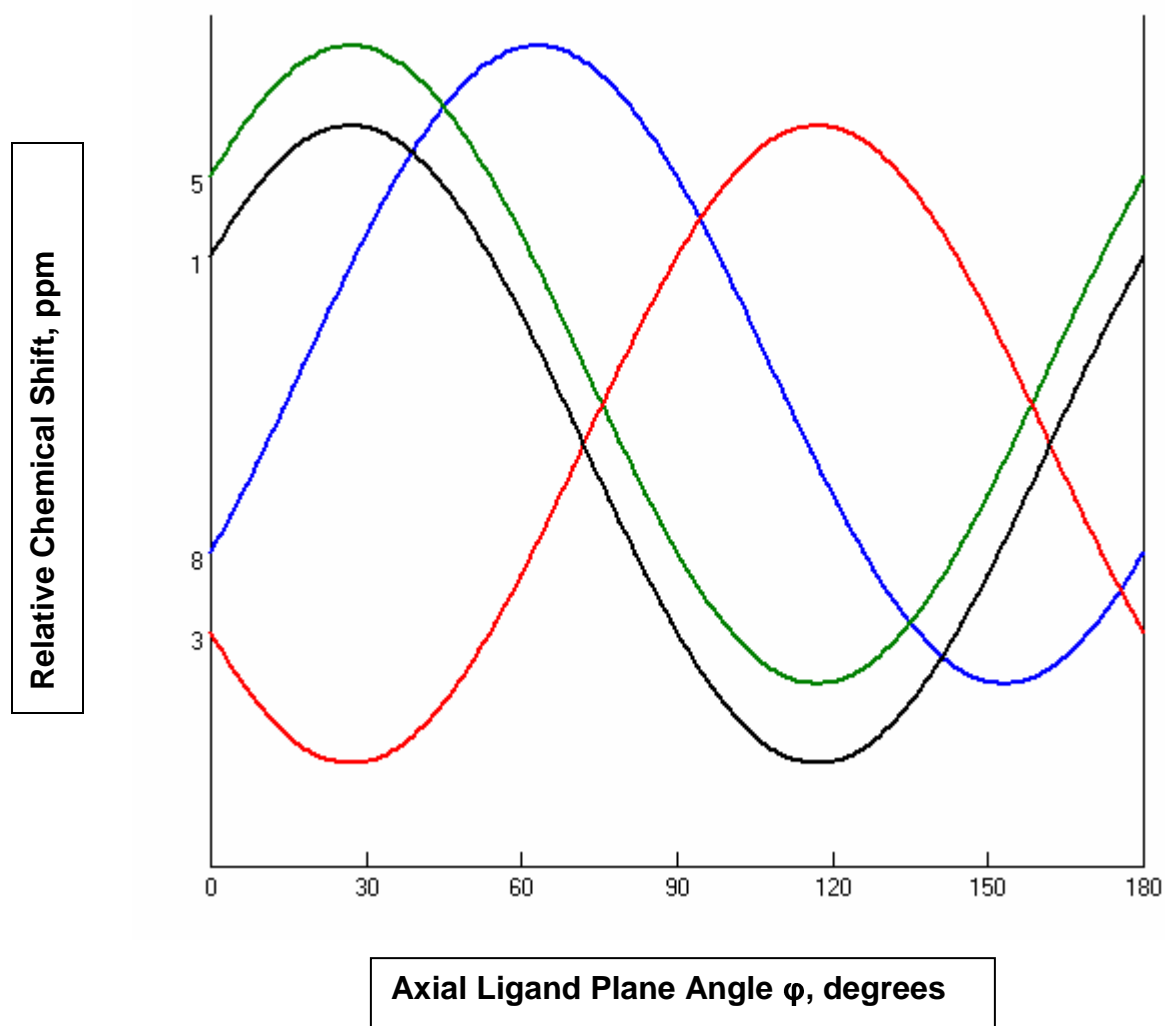

Supplement: NIHMS59136-supplement-1.pdf [file NIHMS59136-supplement-1.pdf]
